# Supplementary material for: Efficacy, Safety and Pharmacokinetics of Up to Two Courses of the Rituximab Biosimilar CT-P10 Versus Innovator Rituximab in Patients with Rheumatoid Arthritis: Results up to Week 72 of a Phase I Randomized Controlled Trial
Source: Springer Nature journal article supplement (doi:10.1007/s40259-017-0232-7), 2017-06-13
Supplement: MOESM1 [file 24111004]

Table S1. Summary of infectious treatment-emergent adverse events recorded during the study (safety population<sup>a</sup>).

| <b>Number of patients with at least 1 TEAE due to infection (%)</b> | <b>CT-P10<br/>(n=102)</b> | <b>RTX<br/>(n=51)</b> |
|---------------------------------------------------------------------|---------------------------|-----------------------|
| Infections and infestations                                         | 39 (38.2)                 | 21 (41.2)             |
| Upper respiratory infection                                         | 11 (10.8)                 | 7 (13.7)              |
| Urinary tract infection                                             | 4 (3.9)                   | 4 (7.8)               |
| Herpes virus infection                                              | 2 (2.0)                   | 4 (7.8)               |
| Lower respiratory tract infection                                   | 3 (2.9)                   | 3 (5.9)               |
| Rhinitis                                                            | 1 (1.0)                   | 2 (3.9)               |
| Ear infection                                                       | 0                         | 1 (2.0)               |
| Gastroenteritis                                                     | 0                         | 1 (2.0)               |
| Pneumonia                                                           | 0                         | 1 (2.0)               |
| Sialadenitis                                                        | 0                         | 1 (2.0)               |
| Abscess                                                             | 2 (2.0)                   | 0                     |
| Enterocolitis infectious                                            | 1 (1.0)                   | 0                     |
| Erysipelas                                                          | 1 (1.0)                   | 0                     |
| Fungal skin infection                                               | 1 (1.0)                   | 0                     |
| Hordeolum                                                           | 1 (1.0)                   | 0                     |
| Paronychia                                                          | 1 (1.0)                   | 0                     |

<sup>a</sup>All patients who received at least one (full or partial) dose of CT-P10 or RTX.

RTX, innovator rituximab; TEAE, treatment-emergent adverse event.

Efficacy, Safety and Pharmacokinetics of Up to Two Courses of the Rituximab Biosimilar CT-P10 versus Innovator Rituximab in Patients with Rheumatoid Arthritis: Results up to Week 72 of a Phase I Randomized Controlled Trial. *BioDrugs*. Dae Hyun Yoo, Chang-Hee Suh, Seung Cheol Shim, et al. Corresponding author affiliation and email: Prof. Won Park, IN-HA University, School of Medicine, Incheon, Republic of Korea; parkwon@inha.ac.kr.
